# Supplementary material for: Aquatic urban ecology at the scale of a capital: community structure and interactions in street gutters
Source: PubMed Central journal article supplement (PMC5739019; doi:10.1038/ismej.2017.166), 2017-10-13
Supplement: ismej2017166x6.pdf [file ismej2017166x6.pdf]

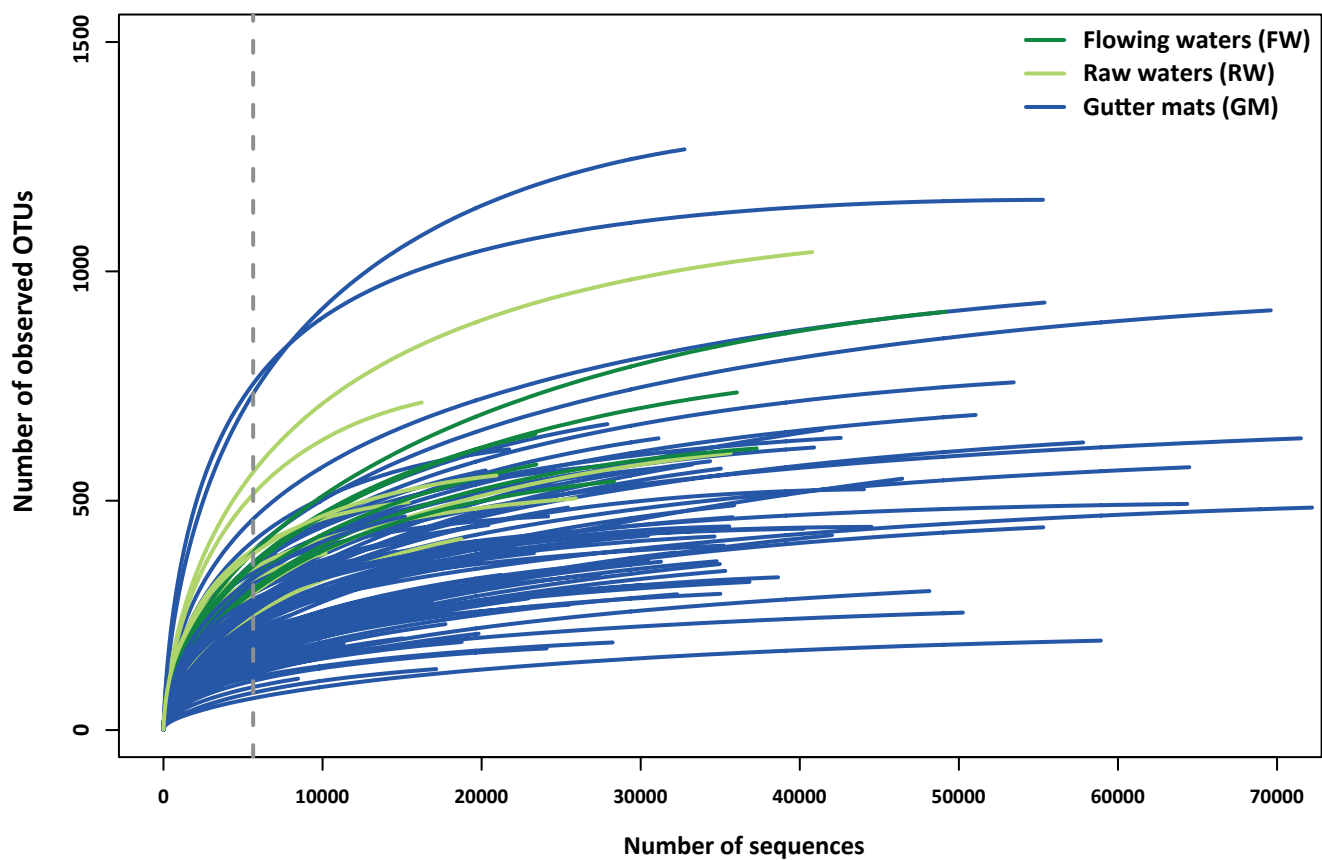

**Supplementary Figure 1** | Rarefaction curves for the numbers of observed OTUs defined by at least 99% similarity between 18S rRNA gene sequences for the 104 analyzed samples. To account for differences in sampling efforts, 5,638 sequences (vertical dotted line) were randomly subsampled from each sample.
