# Supplementary material for: Aquatic urban ecology at the scale of a capital: community structure and interactions in street gutters
Source: PubMed Central journal article supplement (PMC5739019; doi:10.1038/ismej.2017.166), 2017-10-13
Supplement: ismej2017166x7.pdf [file ismej2017166x7.pdf]

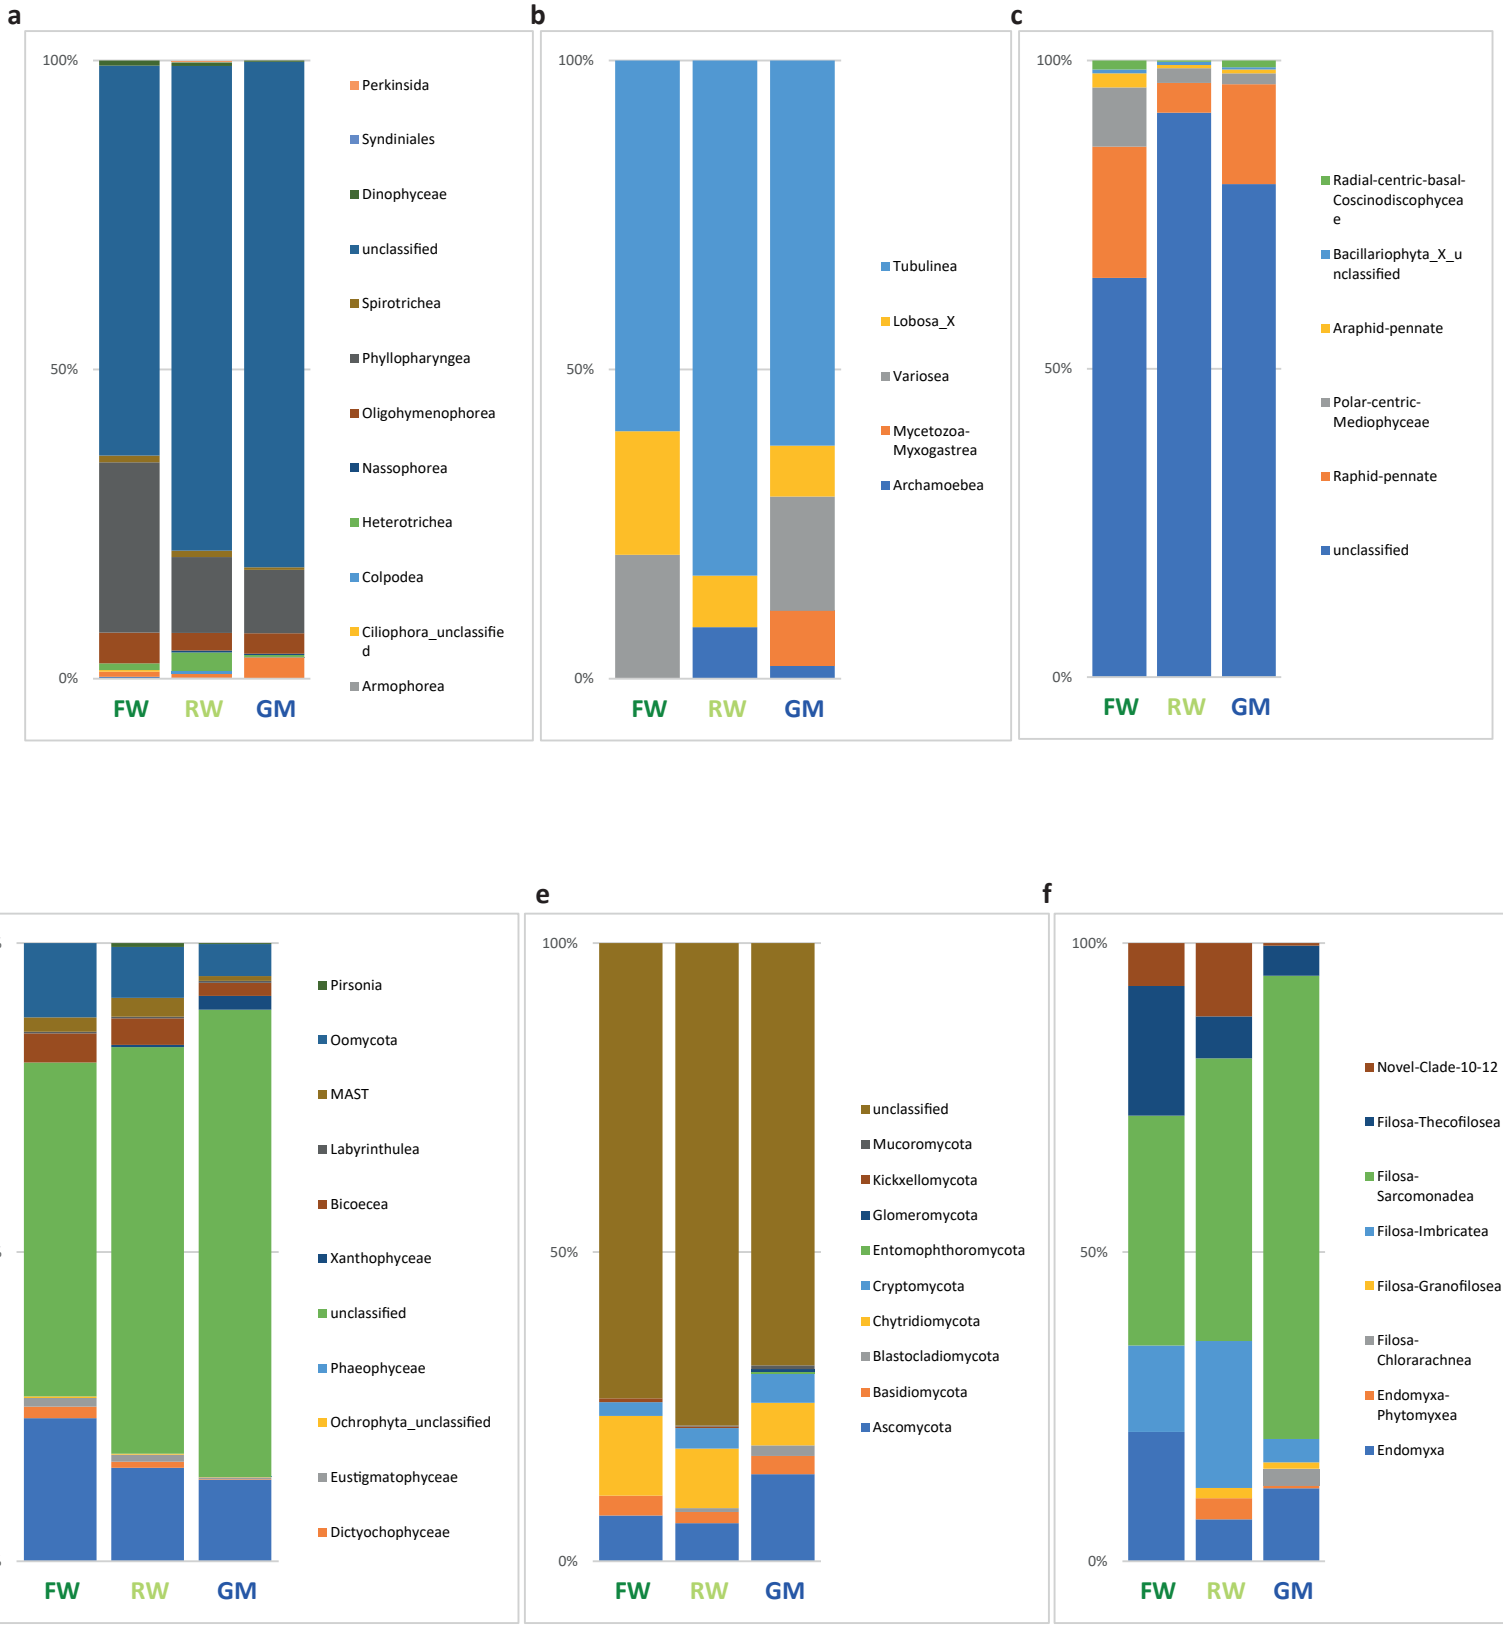

**Supplementary Figure 2 |** Taxonomic composition (in terms of relative abundance) of different groups in the three different compartments (FW, RW, GM). (a) Alveolata, (b) Amoebozoa, (c) Diatoms, (d) Other Stramenopiles, (e) Fungi, and (f) Rhizaria.
