# Supplementary material for: Aquatic urban ecology at the scale of a capital: community structure and interactions in street gutters
Source: PubMed Central journal article supplement (PMC5739019; doi:10.1038/ismej.2017.166), 2017-10-13
Supplement: ismej2017166x8.pdf [file ismej2017166x8.pdf]

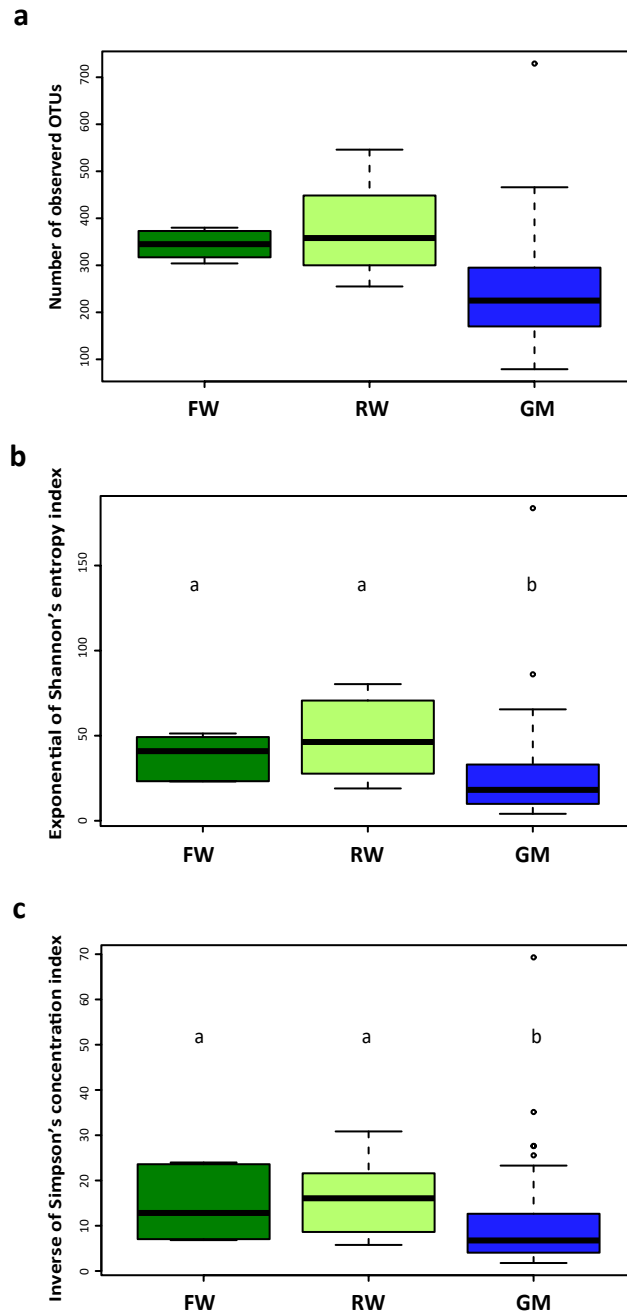

**Supplementary Figure 3** | Measures of the alpha diversity in the three different compartments: flowing waters (FW,  $n=6$ ), raw waters (RW,  $n=8$ ), and gutter mats (GM,  $n=90$ ). **(a)** First Hill number  ${}^0D$ , *i.e.*, number of observed OTUs; **(b)** Second Hill number  ${}^1D$ , *i.e.*, exponential of Shannon entropy index; **(c)** Third Hill number  ${}^2D$ , *i.e.*, inverse Simpson concentration index. Small letters above the boxplots indicate significantly different distributions (Kruskal-Wallis,  $p<0.05$ ).
