# Supplementary material for: Aquatic urban ecology at the scale of a capital: community structure and interactions in street gutters
Source: PubMed Central journal article supplement (PMC5739019; doi:10.1038/ismej.2017.166), 2017-10-13
Supplement: ismej2017166x9.pdf [file ismej2017166x9.pdf]

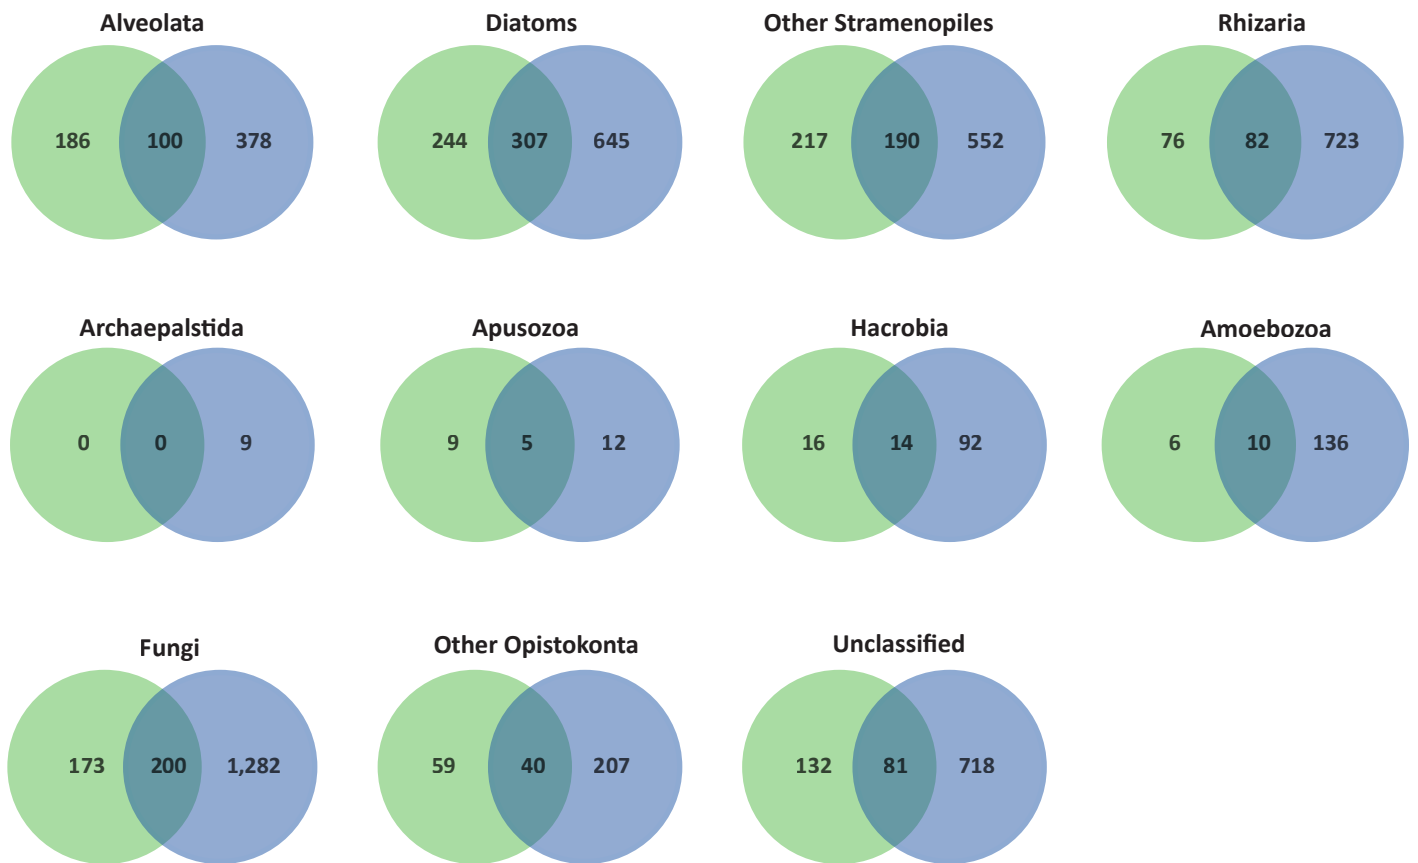

**Supplementary Figure 4** | Venn diagrams representing the numbers of specific and shared OTUs among the non-potable water sources (NPS) and the gutter mats (GM) compartments for different taxonomic groups. The color codes correspond to gutter mats (*in blue*) and non-potable water sources (*in green*).
